# Supplementary material
Source: PubMed Central journal article supplement (PMC9169233)
Supplement: NIHMS1806655-supplement-Table_S1.pdf [file NIHMS1806655-supplement-Table_S1.pdf]

**Table S1. Summary of single B cell cultures**

| Mouse/Treatment               | Secondary Immunogens | Route of Boosts (Ipsi or Contra) | No. IgG Samples <sup>a</sup> | Primary Antigen-only <sup>b</sup> | Secondary Antigen-only <sup>c</sup> | Primary and Secondary Antigens <sup>d</sup> |
|-------------------------------|----------------------|----------------------------------|------------------------------|-----------------------------------|-------------------------------------|---------------------------------------------|
| B6                            | HA H1 SI-06          | Ipsi                             | 2,255                        | NA <sup>e</sup>                   | NA <sup>e</sup>                     | 16%                                         |
| B6                            | HA H1 SI-06          | Contra                           | 2,858                        | NA <sup>e</sup>                   | NA <sup>e</sup>                     | 7.5%                                        |
| AID-Cre/EYFP Ctrl IgG or None | HA H1 SI-06          | Ipsi, YFP <sup>f</sup>           | 514                          | NA <sup>e</sup>                   | NA <sup>e</sup>                     | 21%                                         |
| AID-Cre/EYFP Ctrl IgG or None | HA H1 SI-06          | Ipsi, YFP- <sup>g</sup>          | 1,014                        | NA <sup>e</sup>                   | NA <sup>e</sup>                     | 12%                                         |
| AID-Cre/EYFP MR-1 Ab          | HA H1 SI-06          | Ipsi, YFP <sup>f</sup>           | 343                          | NA <sup>e</sup>                   | NA <sup>e</sup>                     | 21%                                         |
| B6                            | HA H3 X31            | Ipsi                             | 1,825                        | 1.2%                              | 12%                                 | 1%                                          |
| B6                            | HA H3 X31            | Contra                           | 1,696                        | 0.6%                              | 17%                                 | 0.2%                                        |
| B6                            | rPA                  | Ipsi                             | 1,130                        | 1%                                | 25%                                 | 0.4%                                        |
| B6                            | rPA                  | Contra                           | 1,082                        | 0.1%                              | 17%                                 | 0%                                          |

Mice were primed with HA H1 SI-06 in the footpad. Cohorts of mice were then boosted with indicated antigens in the hock ipsilaterally or contralaterally (Figs. 1A and 5A). After boosts, GC B cells were isolated from the draining LNs and placed in single B cell cultures. Numbers of IgG<sup>+</sup> samples and frequencies of specific IgG analyzed in this study are shown.

<sup>a</sup>Number of IgG<sup>+</sup> single B cell cultures analyzed for each group.

<sup>b</sup>Frequency of IgG Abs that bind HA H1 SI-06 but not boosting antigens among all IgG.

<sup>c</sup>Frequency of IgG Abs that bind boosting antigens but not HA H1 SI-06 among all IgG.

<sup>d</sup>Frequency of IgG Abs that bind both HA H1 SI-06 and boosting antigens among all IgG.

<sup>e</sup>Not applicable as mice were primed and boosted with the same immunogens.

<sup>f</sup>YFP<sup>+</sup> GC B cells were analyzed.

<sup>g</sup>YFP<sup>-</sup> GC B cells were analyzed.
