# Supplementary material
Source: PubMed Central journal article supplement (PMC9169233)
Supplement: NIHMS1806655-supplement-Table_S2.pdf [file NIHMS1806655-supplement-Table_S2.pdf]

**Table S2. Primer sequences**

| RT for Set-2                                 | Name         | Sequence (5' → 3')                              |
|----------------------------------------------|--------------|-------------------------------------------------|
| SMART template-switching oligo <sup>2b</sup> | TSO-biog     | /5Biosg/CCAAGCTGGCTAGCACCATGACAGrGrGrG          |
| SMART template-switching oligo <sup>2b</sup> | TSO-P1       | /5Biosg/CCAAGCTGGCTAGCACCATGACAGctagctCAGrGrGrG |
| SMART template-switching oligo <sup>2b</sup> | TSO-P2       | /5Biosg/CCAAGCTGGCTAGCACCATGACAGctagctCAGrGrGrG |
| SMART template-switching oligo <sup>2b</sup> | TSO-P3       | /5Biosg/CCAAGCTGGCTAGCACCATGACAGctagctCAGrGrGrG |
| SMART template-switching oligo <sup>2b</sup> | TSO-P4       | /5Biosg/CCAAGCTGGCTAGCACCATGACAGctagctCAGrGrGrG |
| SMART template-switching oligo <sup>2b</sup> | TSO-P5       | /5Biosg/CCAAGCTGGCTAGCACCATGACAGctagctCAGrGrGrG |
| SMART template-switching oligo <sup>2b</sup> | TSO-P6       | /5Biosg/CCAAGCTGGCTAGCACCATGACAGctagctCAGrGrGrG |
| SMART template-switching oligo <sup>2b</sup> | TSO-P7       | /5Biosg/CCAAGCTGGCTAGCACCATGACAGctagctCAGrGrGrG |
| SMART template-switching oligo <sup>2b</sup> | TSO-P8       | /5Biosg/CCAAGCTGGCTAGCACCATGACAGctagctCAGrGrGrG |
| SMART template-switching oligo <sup>2b</sup> | TSO-P9       | /5Biosg/CCAAGCTGGCTAGCACCATGACAGctagctCAGrGrGrG |
| SMART template-switching oligo <sup>2b</sup> | TSO-P10      | /5Biosg/CCAAGCTGGCTAGCACCATGACAGctagctCAGrGrGrG |
| SMART template-switching oligo <sup>2b</sup> | TSO-P11      | /5Biosg/CCAAGCTGGCTAGCACCATGACAGctagctCAGrGrGrG |
| SMART template-switching oligo <sup>2b</sup> | TSO-P12      | /5Biosg/CCAAGCTGGCTAGCACCATGACAGctagctCAGrGrGrG |
| gene-specific reverse primers                | mlg-RV1      | GAGATGGTTTCTCGATGGG                             |
| gene-specific reverse primers                | mlg-RV1      | GAATGGCCACATCGA                                 |
| gene-specific reverse primers                | mlg-RV1      | CTAACACTCTTCTTGAAG                              |
| gene-specific reverse primers                | mlg-L23-RV1  | AGACATTCTCGAGAGACA                              |
| gene-specific reverse primers                | mlg-L145-RV1 | AACASTCAGCAGCGGACA                              |

| Primary PCR for Set-2       | Name       | Sequence (5' → 3')               |
|-----------------------------|------------|----------------------------------|
| Forward primer <sup>1</sup> | 5Anchor-1  | GGTAGatagctcCAAGCTGGCTAGCACCATGA |
| Forward primer <sup>1</sup> | 5Anchor-2  | GGTAGacagctcCAAGCTGGCTAGCACCATGA |
| Forward primer <sup>1</sup> | 5Anchor-3  | GGTAGgtagctcCAAGCTGGCTAGCACCATGA |
| Forward primer <sup>1</sup> | 5Anchor-4  | GGTAGgtagctcCAAGCTGGCTAGCACCATGA |
| Forward primer <sup>1</sup> | 5Anchor-5  | GGTAGgtagctcCAAGCTGGCTAGCACCATGA |
| Forward primer <sup>1</sup> | 5Anchor-6  | GGTAGgtagctcCAAGCTGGCTAGCACCATGA |
| Forward primer <sup>1</sup> | 5Anchor-7  | GGTAGgtagctcCAAGCTGGCTAGCACCATGA |
| Forward primer <sup>1</sup> | 5Anchor-8  | GGTAGgtagctcCAAGCTGGCTAGCACCATGA |
| Forward primer <sup>1</sup> | 5Anchor-9  | GGTAGgtagctcCAAGCTGGCTAGCACCATGA |
| Forward primer <sup>1</sup> | 5Anchor-10 | GGTAGgtagctcCAAGCTGGCTAGCACCATGA |
| Forward primer <sup>1</sup> | 5Anchor-11 | GGTAGgtagctcCAAGCTGGCTAGCACCATGA |
| Forward primer <sup>1</sup> | 5Anchor-12 | GGTAGgtagctcCAAGCTGGCTAGCACCATGA |
| Reverse primer for IgH      | mlg-RV2    | AOCYTCATTTGAAGCTCTTG             |

| Secondary PCR for Set-2             | Name       | Sequence (5' → 3')               |
|-------------------------------------|------------|----------------------------------|
| Forward primer <sup>1</sup>         | 5Anchor-1  | GGTAGatagctcCAAGCTGGCTAGCACCATGA |
| Forward primer <sup>1</sup>         | 5Anchor-2  | GGTAGacagctcCAAGCTGGCTAGCACCATGA |
| Forward primer <sup>1</sup>         | 5Anchor-3  | GGTAGgtagctcCAAGCTGGCTAGCACCATGA |
| Forward primer <sup>1</sup>         | 5Anchor-4  | GGTAGgtagctcCAAGCTGGCTAGCACCATGA |
| Forward primer <sup>1</sup>         | 5Anchor-5  | GGTAGgtagctcCAAGCTGGCTAGCACCATGA |
| Forward primer <sup>1</sup>         | 5Anchor-6  | GGTAGgtagctcCAAGCTGGCTAGCACCATGA |
| Forward primer <sup>1</sup>         | 5Anchor-7  | GGTAGgtagctcCAAGCTGGCTAGCACCATGA |
| Forward primer <sup>1</sup>         | 5Anchor-8  | GGTAGgtagctcCAAGCTGGCTAGCACCATGA |
| Forward primer <sup>1</sup>         | 5Anchor-9  | GGTAGgtagctcCAAGCTGGCTAGCACCATGA |
| Forward primer <sup>1</sup>         | 5Anchor-10 | GGTAGgtagctcCAAGCTGGCTAGCACCATGA |
| Forward primer <sup>1</sup>         | 5Anchor-11 | GGTAGgtagctcCAAGCTGGCTAGCACCATGA |
| Forward primer <sup>1</sup>         | 5Anchor-12 | GGTAGgtagctcCAAGCTGGCTAGCACCATGA |
| Reverse primer for IgH              | mlgM-A     | GGTAGgtagctcGAGGTGGCTAGGTASTTGCC |
| Reverse primer for IgH              | mlgM-B     | GGTAGgtagctcGAGGTGGCTAGGTASTTGCC |
| Reverse primer for IgH              | mlgM-C     | GGTAGgtagctcGAGGTGGCTAGGTASTTGCC |
| Reverse primer for IgH              | mlgM-D     | GGTAGgtagctcGAGGTGGCTAGGTASTTGCC |
| Reverse primer for IgH              | mlgM-E     | GGTAGgtagctcGAGGTGGCTAGGTASTTGCC |
| Reverse primer for IgH              | mlgM-F     | GGTAGgtagctcGAGGTGGCTAGGTASTTGCC |
| Reverse primer for IgH              | mlgM-G     | GGTAGgtagctcGAGGTGGCTAGGTASTTGCC |
| Reverse primer for IgH <sup>2</sup> | mlgM-H     | GGTAGgtagctcGAGGTGGCTAGGTASTTGCC |
| Reverse primer for IgH              | mlgG12b-A  | GGTAGgtagctcGGGACAGTCACTGAGCTG   |
| Reverse primer for IgH              | mlgG12b-B  | GGTAGgtagctcGGGACAGTCACTGAGCTG   |
| Reverse primer for IgH              | mlgG12b-C  | GGTAGgtagctcGGGACAGTCACTGAGCTG   |
| Reverse primer for IgH              | mlgG12b-D  | GGTAGgtagctcGGGACAGTCACTGAGCTG   |
| Reverse primer for IgH              | mlgG12b-E  | GGTAGgtagctcGGGACAGTCACTGAGCTG   |
| Reverse primer for IgH              | mlgG12b-F  | GGTAGgtagctcGGGACAGTCACTGAGCTG   |
| Reverse primer for IgH              | mlgG12b-G  | GGTAGgtagctcGGGACAGTCACTGAGCTG   |
| Reverse primer for IgH              | mlgG12b-H  | GGTAGgtagctcGGGACAGTCACTGAGCTG   |
| Reverse primer for IgH              | mlgG2ac-A  | GGTAGgtagctcGAGGTACAGTCACTGAGCTG |
| Reverse primer for IgH              | mlgG2ac-B  | GGTAGgtagctcGAGGTACAGTCACTGAGCTG |
| Reverse primer for IgH              | mlgG2ac-C  | GGTAGgtagctcGAGGTACAGTCACTGAGCTG |
| Reverse primer for IgH              | mlgG2ac-D  | GGTAGgtagctcGAGGTACAGTCACTGAGCTG |
| Reverse primer for IgH              | mlgG2ac-E  | GGTAGgtagctcGAGGTACAGTCACTGAGCTG |
| Reverse primer for IgH              | mlgG2ac-F  | GGTAGgtagctcGAGGTACAGTCACTGAGCTG |
| Reverse primer for IgH              | mlgG2ac-G  | GGTAGgtagctcGAGGTACAGTCACTGAGCTG |
| Reverse primer for IgH              | mlgG2ac-H  | GGTAGgtagctcGAGGTACAGTCACTGAGCTG |
| Reverse primer for IgH              | mlgG3-A    | GGTAGgtagctcGGGTACAGTCACTGAGCTG  |
| Reverse primer for IgH              | mlgG3-B    | GGTAGgtagctcGGGTACAGTCACTGAGCTG  |
| Reverse primer for IgH              | mlgG3-C    | GGTAGgtagctcGGGTACAGTCACTGAGCTG  |
| Reverse primer for IgH              | mlgG3-D    | GGTAGgtagctcGGGTACAGTCACTGAGCTG  |
| Reverse primer for IgH              | mlgG3-E    | GGTAGgtagctcGGGTACAGTCACTGAGCTG  |
| Reverse primer for IgH              | mlgG3-F    | GGTAGgtagctcGGGTACAGTCACTGAGCTG  |
| Reverse primer for IgH              | mlgG3-G    | GGTAGgtagctcGGGTACAGTCACTGAGCTG  |
| Reverse primer for IgH <sup>2</sup> | mlgG3-H    | GGTAGgtagctcGGGTACAGTCACTGAGCTG  |

<sup>1</sup>/5Biosg/ represents a biotin at 5' end. There are three riboguanosines (rGrGrG) at 3' end.  
<sup>2</sup>These primers contain plate-associated barcodes (0-12) that are indicated in lowercase letters.  
<sup>3</sup>These primers contain well-associated barcodes (1-12) that are indicated in lowercase letters.  
<sup>4</sup>These primers contain well-associated barcodes (A-H) that are indicated in lowercase letters.

| RT for Set-1                  | Name       | Sequence (5' → 3')   |
|-------------------------------|------------|----------------------|
| gene-specific reverse primers | mlgG-RV1   | GAGATGGTTTCTCGATGGG  |
| gene-specific reverse primers | mlgK2-RV1  | CAGGACCTTGTCTCTAACAC |
| gene-specific reverse primers | mlgL23-RV1 | GTTCCYAGGCTAAGGAAAC  |
| gene-specific reverse primers | mlgLC1-RT  | CCTCTGTGGTAAATGAAAG  |
| gene-specific reverse primers | mlgLC4-RT  | CCTCTGTGGTAAAGTGAG   |

| Primary PCR for Set-1  | Name      | Sequence (5' → 3')       |
|------------------------|-----------|--------------------------|
| Forward primer         | mVH1-1    | agRYcagctcaRcaigtct      |
| Forward primer         | mVH1-2    | aggtccaacagccagccagc     |
| Forward primer         | mVH2      | ctctctctctctctctctctct   |
| Forward primer         | mVH3      | ctctctctctctctctctctct   |
| Forward primer         | mVH4      | gaagtgaaagctctctctctct   |
| Forward primer         | mVH5      | gaagtgaaagctctctctctct   |
| Forward primer         | mVH6      | agtgactgagagctctctctctct |
| Forward primer         | mVH7      | ctctctctctctctctctctct   |
| Forward primer         | mVH8      | ctctctctctctctctctctct   |
| Forward primer         | mVH9      | ctctctctctctctctctctct   |
| Forward primer         | mVH10     | ctctctctctctctctctctct   |
| Forward primer         | mVH11     | atggagtggaagctctctctct   |
| Forward primer         | mVH12     | agctctctctctctctctctct   |
| Forward primer         | mVH13     | ctctctctctctctctctctct   |
| Forward primer         | mVH14     | atgcaagctctctctctctctct  |
| Forward primer         | mVH15     | ctctctctctctctctctctct   |
| Forward primer         | mVH16     | ctctctctctctctctctctct   |
| Reverse primer for IgH | mlgHC-RV2 | GTTCAGCTGTCATTGAACTC     |

| Secondary PCR for Set-1     | Name          | Sequence (5' → 3')                  |
|-----------------------------|---------------|-------------------------------------|
| Forward primer <sup>1</sup> | mlgHV-FW-1    | GGTAGatagctcGAGGTGACAGTGCAGGAGTCTGG |
| Forward primer <sup>1</sup> | mlgHV-FW-2    | GGTAGacagctcGAGGTGACAGTGCAGGAGTCTGG |
| Forward primer <sup>1</sup> | mlgHV-FW-3    | GGTAGgtagctcGAGGTGACAGTGCAGGAGTCTGG |
| Forward primer <sup>1</sup> | mlgHV-FW-4    | GGTAGgtagctcGAGGTGACAGTGCAGGAGTCTGG |
| Forward primer <sup>1</sup> | mlgHV-FW-5    | GGTAGgtagctcGAGGTGACAGTGCAGGAGTCTGG |
| Forward primer <sup>1</sup> | mlgHV-FW-6    | GGTAGgtagctcGAGGTGACAGTGCAGGAGTCTGG |
| Forward primer <sup>1</sup> | mlgHV-FW-7    | GGTAGgtagctcGAGGTGACAGTGCAGGAGTCTGG |
| Forward primer <sup>1</sup> | mlgHV-FW-8    | GGTAGgtagctcGAGGTGACAGTGCAGGAGTCTGG |
| Forward primer <sup>1</sup> | mlgHV-FW-9    | GGTAGgtagctcGAGGTGACAGTGCAGGAGTCTGG |
| Forward primer <sup>1</sup> | mlgHV-FW-10   | GGTAGgtagctcGAGGTGACAGTGCAGGAGTCTGG |
| Forward primer <sup>1</sup> | mlgHV-FW-11   | GGTAGgtagctcGAGGTGACAGTGCAGGAGTCTGG |
| Forward primer <sup>1</sup> | mlgHV-FW-12   | GGTAGgtagctcGAGGTGACAGTGCAGGAGTCTGG |
| Reverse primer for IgH      | mlgHC12b-RV-A | GGTAGgtagctcGAGGTGACAGTGCAGGAGTCTGG |
| Reverse primer for IgH      | mlgHC12b-RV-B | GGTAGgtagctcGAGGTGACAGTGCAGGAGTCTGG |
| Reverse primer for IgH      | mlgHC12b-RV-C | GGTAGgtagctcGAGGTGACAGTGCAGGAGTCTGG |
| Reverse primer for IgH      | mlgHC12b-RV-D | GGTAGgtagctcGAGGTGACAGTGCAGGAGTCTGG |
| Reverse primer for IgH      | mlgHC12b-RV-E | GGTAGgtagctcGAGGTGACAGTGCAGGAGTCTGG |
| Reverse primer for IgH      | mlgHC12b-RV-F | GGTAGgtagctcGAGGTGACAGTGCAGGAGTCTGG |
| Reverse primer for IgH      | mlgHC12b-RV-G | GGTAGgtagctcGAGGTGACAGTGCAGGAGTCTGG |
| Reverse primer for IgH      | mlgHC12b-RV-H | GGTAGgtagctcGAGGTGACAGTGCAGGAGTCTGG |
| Reverse primer for IgH      | mlgHC2ac-RV-A | GGTAGgtagctcGAGGTGACAGTGCAGGAGTCTGG |
| Reverse primer for IgH      | mlgHC2ac-RV-B | GGTAGgtagctcGAGGTGACAGTGCAGGAGTCTGG |
| Reverse primer for IgH      | mlgHC2ac-RV-C | GGTAGgtagctcGAGGTGACAGTGCAGGAGTCTGG |
| Reverse primer for IgH      | mlgHC2ac-RV-D | GGTAGgtagctcGAGGTGACAGTGCAGGAGTCTGG |
| Reverse primer for IgH      | mlgHC2ac-RV-E | GGTAGgtagctcGAGGTGACAGTGCAGGAGTCTGG |
| Reverse primer for IgH      | mlgHC2ac-RV-F | GGTAGgtagctcGAGGTGACAGTGCAGGAGTCTGG |
| Reverse primer for IgH      | mlgHC2ac-RV-G | GGTAGgtagctcGAGGTGACAGTGCAGGAGTCTGG |
| Reverse primer for IgH      | mlgHC2ac-RV-H | GGTAGgtagctcGAGGTGACAGTGCAGGAGTCTGG |

<sup>1</sup>These primers contain well-associated barcodes (1-12) that are indicated in lowercase letters.  
<sup>2</sup>These primers contain well-associated barcodes (A-H) that are indicated in lowercase letters.
