# Supplementary material
Source: PubMed Central journal article supplement (PMC9169233)
Supplement: NIHMS1806655-supplement-Table_S3.pdf [file NIHMS1806655-supplement-Table_S3.pdf]

**Table S3. Raw data excel file**

| <b>Fig. 1B</b> | Before | After  |
|----------------|--------|--------|
| Ipsi-1         | 3      | 26.5   |
| Ipsi-2         | 2.5    | 18     |
| Ipsi-3         | 1.8    | 27.5   |
| Ipsi-4         | 1.4    | 14     |
| Ipsi-5         | 1.6    | 12     |
| Ipsi-6         | 1.6    | 12     |
| Ipsi-7         | 4      | 64     |
| Ipsi-8         | 3      | 100    |
| Ipsi-9         | 2.4    | 40     |
| Ipsi-10        | 0.26   | 32     |
| Ipsi-11        | 3      | 18     |
| Ipsi-12        | 6      | 40     |
| Ipsi-13        | 6      | 60     |
| Ipsi-14        | 0.96   | 52     |
| Ipsi-15        | 3.6    | 76     |
| Ipsi-16        | 7.6    | 120    |
| Ipsi-17        | 16     | 120    |
| Contra-1       | 3.5    | 60     |
| Contra-2       | 2.5    | 15     |
| Contra-3       | 1.85   | 10.5   |
| Contra-4       | 3      | 17.5   |
| Contra-5       | 4      | 13     |
| Contra-6       | 0.66   | 17     |
| Contra-7       | 4      | 40     |
| Contra-8       | 4      | 80     |
| Contra-9       | 4      | 56     |
| Contra-10      | 2.4    | 12     |
| Contra-11      | 4.2    | 9      |
| Contra-12      | 0.9    | 60     |
| No boost-1     | 2.5    | 2.25   |
| No boost-2     | 3      | 1.8    |
| No boost-3     | 1.8    | 2.25   |
| No boost-4     | 5      | 5      |
| No boost-5     | 1      | 1.2    |
| No boost-6     | 2.2    | 2.4    |
| No boost-7     | 10     | 10     |
| No boost-8     | 1.2    | 0.96   |
| No boost-9     | 1.8    | 1.4    |
| <b>Fig. 1C</b> | Ipsi   | Contra |
| sample-1       | 8.83   | 17.14  |
| sample-2       | 7.2    | 6      |
| sample-3       | 15.28  | 5.68   |
| sample-4       | 10     | 5.83   |
| sample-5       | 7.5    | 3.25   |
| sample-6       | 7.5    | 25.76  |

|           |        |       |
|-----------|--------|-------|
| sample-7  | 16     | 10    |
| sample-8  | 33.33  | 20    |
| sample-9  | 16.67  | 14    |
| sample-10 | 123.08 | 5     |
| sample-11 | 6      | 2.14  |
| sample-12 | 6.67   | 66.67 |
| sample-13 | 10     |       |
| sample-14 | 54.17  |       |
| sample-15 | 21.11  |       |
| sample-16 | 15.79  |       |
| sample-17 | 7.5    |       |

| <b>Fig. 1E</b> | Naïve | No boost | Ipsi  | Contra |
|----------------|-------|----------|-------|--------|
| sample-1       | 20.3  | 111      | 10400 | 3120   |
| sample-2       | 12.1  | 211      | 684   | 2700   |
| sample-3       | 25.5  | 95.6     | 1420  | 2240   |
| sample-4       | 70.8  | 116      | 1350  | 465    |
| sample-5       | 13.7  | 967      | 95.2  | 1170   |
| sample-6       | 5.37  | 141      | 2450  | 10900  |
| sample-7       | 27.6  | 425      | 5840  | 305    |
| sample-8       | 30.2  | 142      | 6080  | 219    |
| sample-9       | 44.2  | 121      | 2250  | 5710   |
| sample-10      | 33.9  | 104      | 3610  | 2180   |
| sample-11      | 19.1  | 28.5     | 2780  | 230    |
| sample-12      | 510   | 139      | 870   | 588    |
| sample-13      |       | 178      | 3420  | 1380   |
| sample-14      |       |          | 16200 |        |
| sample-15      |       |          | 4130  |        |
| sample-16      |       |          | 538   |        |
| sample-17      |       |          | 3500  |        |

| <b>Fig. 2B</b> | Naïve | No boost | Ipsi  | Contra |
|----------------|-------|----------|-------|--------|
| sample-1       | 163   | 329      | 79600 | 17900  |
| sample-2       | 77.6  | 2460     | 42100 | 66300  |
| sample-3       | 100   | 910      | 82400 | 81200  |
| sample-4       | 2030  | 2360     | 53000 | 20800  |
| sample-5       | 198   | 3680     | 408   | 24100  |
| sample-6       | 54.5  | 2180     | 14400 | 30600  |
| sample-7       | 27.6  | 3280     | 10900 | 4550   |
| sample-8       | 164   | 3640     | 37900 | 11700  |
| sample-9       | 1590  | 1110     | 68700 | 46900  |
| sample-10      | 1270  | 1500     | 35900 | 14600  |
| sample-11      | 529   | 1910     | 18700 | 14800  |
| sample-12      | 1060  | 1340     | 31200 | 25600  |
| sample-13      |       | 1440     | 45200 | 15300  |
| sample-14      |       |          | 50100 |        |
| sample-15      |       |          | 28200 |        |
| sample-16      |       |          | 33700 |        |
| sample-17      |       |          | 39600 |        |

| <b>Fig. 2D</b> | Ipsi  | Contra |
|----------------|-------|--------|
| sample-1       | 21.43 | 11.11  |
| sample-2       | 31.82 | 18.18  |
| sample-3       | 4.76  | 6.25   |
| sample-4       | 0     | 0      |
| sample-5       | 27.91 | 0      |
| sample-6       | 2.5   | 0      |
| sample-7       | 8.33  | 0      |
| sample-8       | 17.65 | 0      |
| sample-9       | 28.57 | 6.67   |
| sample-10      | 40    | 0      |
| sample-11      | 8.57  | 0      |
| sample-12      | 0     | 0      |
| sample-13      | 0     |        |
| sample-14      | 0     |        |

| <b>Fig. 3C</b> | AvIn >0.1 |
|----------------|-----------|
| sample-1       | 20        |
| sample-2       | 17        |
| sample-3       | 18        |
| sample-4       | 18        |
| sample-5       | 17        |
| sample-6       | 8         |
| sample-7       | 11        |
| sample-8       | 17        |
| sample-9       | 8         |
| sample-10      | 10        |
| sample-11      | 12        |

| <b>Fig. 4B</b> | Ipsi  | Contra | Ipsi +MR1 |
|----------------|-------|--------|-----------|
| sample-1       | 13.20 | 0.25   | 8.58      |
| sample-2       | 1.34  | 0.79   | 11.30     |
| sample-3       | 9.83  | 6.17   | 10.40     |
| sample-4       | 14.20 | 2.55   | 5.24      |
| sample-5       | 18.50 | 0.10   |           |
| sample-6       | 3.11  | 0.41   |           |
| sample-7       | 2.75  | 0.36   |           |
| sample-8       | 1.85  | 1.15   |           |
| sample-9       | 5.12  | 2.58   |           |
| sample-10      | 3.96  | 4.92   |           |
| sample-11      | 4.39  | 2.85   |           |
| sample-12      | 1.96  | 3.72   |           |

| <b>Fig. 4C</b> | Ipsi  | Contra | Ipsi +MR1 |
|----------------|-------|--------|-----------|
| sample-1       | 5720  | 154    | 4740      |
| sample-2       | 1180  | 681    | 5250      |
| sample-3       | 7960  | 2060   | 1700      |
| sample-4       | 13000 | 1950   | 2570      |

|           |       |      |
|-----------|-------|------|
| sample-5  | 6940  | 38   |
| sample-6  | 6290  | 455  |
| sample-7  | 3400  | 149  |
| sample-8  | 3440  | 222  |
| sample-9  | 5560  | 1320 |
| sample-10 | 9750  | 2600 |
| sample-11 | 17000 | 1350 |
| sample-12 | 3960  | 3270 |

| <b>Fig. 5B</b> | H3 X31 | H1 SI-06 |
|----------------|--------|----------|
| sample-1       | 1.3    | 1430     |
| sample-2       | 4      | 495      |
| sample-3       | 176    | 6600     |
| sample-4       | 22     | 1430     |
| sample-5       | 11     | 143      |
| sample-6       | 2.2    | 770      |
| sample-7       | 10.1   | 1870     |
| sample-8       | 110    | 340      |
| sample-9       | 110    | 1980     |
| sample-10      | 1.76   | 2750     |
| sample-11      | 330    | 3410     |
| sample-12      | 1.32   | 990      |
| sample-13      | 88     | 4400     |
| sample-14      | 99     | 140      |
| sample-15      | 22     | 1100     |
| sample-16      | 3.96   | 340      |
| sample-17      | 50.6   | 330      |
| sample-18      | 17.6   | 3300     |
| sample-19      | 4.4    | 1650     |
| sample-20      | 22     | 495      |
| sample-21      | 33     | 1320     |
| sample-22      | 77     | 8800     |
| sample-23      | 3.3    | 12100    |

| <b>Fig. 5C</b> | Before | After |
|----------------|--------|-------|
| Ipsi-1         | 1.3    | 17.6  |
| Ipsi-2         | 4      | 44    |
| Ipsi-3         | 176    | 2200  |
| Ipsi-4         | 22     | 1144  |
| Ipsi-5         | 11     | 88    |
| Ipsi-6         | 2.2    | 26.4  |
| Ipsi-7         | 10.1   | 48.4  |
| Ipsi-8         | 110    | 352   |
| Ipsi-9         | 110    | 352   |
| Ipsi-10        | 1.76   | 35.2  |
| Contra-1       | 330    | 792   |
| Contra-2       | 1.32   | 4.4   |
| Contra-3       | 88     | 156.2 |
| Contra-4       | 99     | 330   |

|            |      |       |
|------------|------|-------|
| Contra-5   | 22   | 156.2 |
| Contra-6   | 3.96 | 11    |
| Contra-7   | 50.6 | 99    |
| Contra-8   | 17.6 | 50.6  |
| No boost-1 | 4.4  | 4.4   |
| No boost-2 | 22   | 22    |
| No boost-3 | 33   | 33    |
| No boost-4 | 77   | 110   |
| No boost-5 | 3.3  | 4.18  |

| <b>Fig. 5D</b> | Ipsi  | Contra |
|----------------|-------|--------|
| sample-1       | 13.54 | 2.4    |
| sample-2       | 11    | 3.33   |
| sample-3       | 12.5  | 1.78   |
| sample-4       | 52    | 3.33   |
| sample-5       | 8     | 7.1    |
| sample-6       | 12    | 2.78   |
| sample-7       | 4.79  | 1.96   |
| sample-8       | 3.2   | 2.88   |
| sample-9       | 3.2   |        |
| sample-10      | 20    |        |

| <b>Fig. 5E</b> | Before | After |
|----------------|--------|-------|
| Ipsi-1         | 1.43   | 1.43  |
| Ipsi-2         | 0.495  | 0.61  |
| Ipsi-3         | 6.6    | 14.3  |
| Ipsi-4         | 1.43   | 6.6   |
| Ipsi-5         | 0.143  | 1.87  |
| Ipsi-6         | 0.77   | 1.21  |
| Ipsi-7         | 1.87   | 2.75  |
| Ipsi-8         | 0.34   | 0.34  |
| Ipsi-9         | 1.98   | 1.98  |
| Ipsi-10        | 2.75   | 4.18  |
| Contra-1       | 3.41   | 2.64  |
| Contra-2       | 0.99   | 0.13  |
| Contra-3       | 4.4    | 5.5   |
| Contra-4       | 0.14   | 0.17  |
| Contra-5       | 1.1    | 1.54  |
| Contra-6       | 0.34   | 0.15  |
| Contra-7       | 0.33   | 0.396 |
| Contra-8       | 3.3    | 3.3   |
| No boost-1     | 1.65   | 1.76  |
| No boost-2     | 0.495  | 0.57  |
| No boost-3     | 1.32   | 1.54  |
| No boost-4     | 8.8    | 9.9   |
| No boost-5     | 12.1   | 12.1  |

| <b>Fig. 6B</b> | Ipsi  | Contra |
|----------------|-------|--------|
| sample-1       | 41300 | 26700  |

|           |        |       |
|-----------|--------|-------|
| sample-2  | 75300  | 45200 |
| sample-3  | 8570   | 3460  |
| sample-4  | 4400   | 47300 |
| sample-5  | 15100  | 96200 |
| sample-6  | 27600  | 40900 |
| sample-7  | 129000 | 87700 |
| sample-8  | 65700  | 29700 |
| sample-9  | 62400  |       |
| sample-10 | 209000 |       |

| <b>Fig. 6D</b> | Ipsi   | Contra |
|----------------|--------|--------|
| sample-1       | 41300  | 26700  |
| sample-2       | 75300  | 45200  |
| sample-3       | 8570   | 3460   |
| sample-4       | 4400   | 47300  |
| sample-5       | 15100  | 96200  |
| sample-6       | 27600  | 40900  |
| sample-7       | 129000 | 87700  |
| sample-8       | 65700  | 29700  |
| sample-9       | 62400  |        |
| sample-10      | 209000 |        |

| <b>Fig. 6F</b> | Ipsi | Contra |
|----------------|------|--------|
| sample-1       | 2.3  | 0      |
| sample-2       | 0    | 0      |
| sample-3       | 2.1  | 0      |
| sample-4       | 1.6  | 0      |
| sample-5       | 1.5  | 0      |

| <b>fig. S1A</b> | Before | After |
|-----------------|--------|-------|
| Ipsi-1          | 3      | 26.5  |
| Ipsi-2          | 2.5    | 18    |
| Ipsi-3          | 1.8    | 27.5  |
| Ipsi-4          | 1.4    | 14    |
| Contra-1        | 3.5    | 60    |
| Contra-2        | 2.5    | 15    |
| Contra-3        | 1.85   | 10.5  |
| Contra-4        | 3      | 17.5  |
| No boost-1      | 2.5    | 2.25  |
| No boost-2      | 3      | 1.8   |
| No boost-3      | 1.8    | 2.25  |

| <b>fig. S1B</b> | Before | After |
|-----------------|--------|-------|
| Ipsi-1          | 0.26   | 32    |
| Ipsi-2          | 3      | 18    |
| Ipsi-3          | 6      | 60    |
| Ipsi-4          | 6      | 40    |
| Ipsi-5          | 4      | 64    |
| Ipsi-6          | 1.6    | 12    |

|            |     |     |
|------------|-----|-----|
| Ipsi-7     | 1.6 | 12  |
| Ipsi-8     | 2.4 | 40  |
| Ipsi-9     | 3   | 100 |
| Contra-1   | 4   | 13  |
| Contra-2   | 0.7 | 17  |
| Contra-3   | 4   | 80  |
| Contra-4   | 4   | 40  |
| No boost-1 | 2.2 | 0.9 |
| No boost-2 | 10  | 10  |
| No boost-3 | 5   | 5   |
| No boost-4 | 1   | 1.2 |

|                 |        |       |
|-----------------|--------|-------|
| <b>fig. S1C</b> | Before | After |
| Ipsi-1          | 0.96   | 52    |
| Ipsi-2          | 3.6    | 76    |
| Ipsi-3          | 7.6    | 120   |
| Ipsi-4          | 16     | 120   |
| Contra-1        | 4      | 56    |
| Contra-2        | 2.4    | 12    |
| Contra-3        | 4.2    | 9     |
| Contra-4        | 0.9    | 60    |
| No boost-1      | 1.2    | 0.96  |
| No boost-2      | 1.8    | 1.4   |

|                 |       |        |          |
|-----------------|-------|--------|----------|
| <b>fig. S1D</b> | Ipsi  | Contra | No boost |
| sample-1        | 8.83  | 17.14  | 0.9      |
| sample-2        | 7.2   | 6      | 0.6      |
| sample-3        | 15.28 | 5.68   | 1.25     |
| sample-4        | 10    | 5.83   |          |

|                 |        |        |          |
|-----------------|--------|--------|----------|
| <b>fig. S1E</b> | Ipsi   | Contra | No boost |
| sample-1        | 7.5    | 3.25   | 1        |
| sample-2        | 7.5    | 25.76  | 1.2      |
| sample-3        | 16     | 10     | 1.09     |
| sample-4        | 33.33  | 20     | 1        |
| sample-5        | 16.67  |        |          |
| sample-6        | 123.08 |        |          |
| sample-7        | 6      |        |          |
| sample-8        | 6.67   |        |          |
| sample-9        | 10     |        |          |

|                 |       |        |          |
|-----------------|-------|--------|----------|
| <b>fig. S1F</b> | Ipsi  | Contra | No boost |
| sample-1        | 54.17 | 14     | 0.8      |
| sample-2        | 21.11 | 5      | 0.78     |
| sample-3        | 15.79 | 2.14   |          |
| sample-4        | 7.5   | 66.67  |          |

|                 |       |        |          |
|-----------------|-------|--------|----------|
| <b>fig. S1G</b> | Ipsi  | Contra | No boost |
| sample-1        | 10400 | 3120   | 111      |

|          |      |      |      |
|----------|------|------|------|
| sample-2 | 684  | 2700 | 211  |
| sample-3 | 1420 | 2240 | 95.6 |
| sample-4 | 1350 | 465  | 116  |
| sample-5 |      |      | 967  |

| <b>fig. S1H</b> | Ipsi | Contra | No boost |
|-----------------|------|--------|----------|
| sample-1        | 95.2 | 1170   | 141      |
| sample-2        | 2450 | 10900  | 425      |
| sample-3        | 5840 | 305    | 142      |
| sample-4        | 6080 | 219    | 121      |
| sample-5        | 2250 | 5710   |          |
| sample-6        | 3610 |        |          |
| sample-7        | 2780 |        |          |
| sample-8        | 870  |        |          |
| sample-9        | 3420 |        |          |

| <b>fig. S1I</b> | Ipsi  | Contra | No boost |
|-----------------|-------|--------|----------|
| sample-1        | 16200 | 2180   | 104      |
| sample-2        | 4130  | 230    | 28.5     |
| sample-3        | 538   | 588    | 139      |
| sample-4        | 3500  | 1380   | 178      |

| <b>fig. S2A</b> | Ipsi  | Contra | No boost |
|-----------------|-------|--------|----------|
| sample-1        | 79600 | 17900  | 329      |
| sample-2        | 42100 | 66300  | 2460     |
| sample-3        | 82400 | 81200  | 910      |
| sample-4        | 53000 | 20800  | 2360     |
| sample-5        |       |        | 3680     |

| <b>fig. S2B</b> | Ipsi  | Contra | No boost |
|-----------------|-------|--------|----------|
| sample-1        | 408   | 24100  | 2180     |
| sample-2        | 14400 | 30600  | 3280     |
| sample-3        | 10900 | 4550   | 3640     |
| sample-4        | 37900 | 11700  | 1110     |
| sample-5        | 68700 | 46900  |          |
| sample-6        | 35900 |        |          |
| sample-7        | 18700 |        |          |
| sample-8        | 31200 |        |          |
| sample-9        | 45200 |        |          |

| <b>fig. S2C</b> | Ipsi  | Contra | No boost |
|-----------------|-------|--------|----------|
| sample-1        | 50100 | 14600  | 1500     |
| sample-2        | 28200 | 14800  | 1910     |
| sample-3        | 33700 | 25600  | 1340     |
| sample-4        | 39600 | 15300  | 1440     |

| <b>fig. S2D</b> | Ipsi | Contra |
|-----------------|------|--------|
| sample-1        | 30.8 | 2.9    |



|           |      |      |
|-----------|------|------|
| sample-2  | 13.8 | 3.4  |
| sample-3  | 14.2 | 6.5  |
| sample-4  | 10.4 | 6.3  |
| sample-5  | 11.4 | 3.5  |
| sample-6  | 18.8 | 4.8  |
| sample-7  | 16.1 | 6.9  |
| sample-8  | 12.8 | 15.2 |
| sample-9  | 20   | 16.5 |
| sample-10 | 8.5  | 12.8 |
| sample-11 | 21.9 | 9.9  |
| sample-12 | 10.2 | 4.2  |
| sample-13 | 12.8 |      |
| sample-14 | 17.6 |      |

| <b>fig. S3C</b> | naïve | Ipsi | Contra |
|-----------------|-------|------|--------|
| sample-1        | 0     | 12.9 | 14.4   |
| sample-2        | 0     | 17   | 22.8   |
| sample-3        | 0     | 7.44 | 32     |
| sample-4        | 0     | 50.4 | 27     |
| sample-5        |       | 10.6 | 8.25   |
| sample-6        |       | 8.46 | 1.28   |
| sample-7        |       | 15.7 | 14.3   |
| sample-8        |       | 18.6 | 7.18   |
| sample-9        |       | 34.7 | 19.1   |
| sample-10       |       | 13.9 | 29.1   |
| sample-11       |       | 16.4 | 12.7   |
| sample-12       |       | 21   | 24.3   |

| <b>fig. S3D</b> | naïve | Ipsi | Contra |
|-----------------|-------|------|--------|
| sample-1        | 0     | 813  | 245    |
| sample-2        | 0     | 1350 | 312    |
| sample-3        | 0     | 148  | 661    |
| sample-4        | 0     | 1060 | 569    |
| sample-5        |       | 320  | 231    |
| sample-6        |       | 1470 | 63.4   |
| sample-7        |       | 1670 | 1800   |
| sample-8        |       | 9910 | 642    |
| sample-9        |       | 6970 | 9080   |
| sample-10       |       | 1690 | 5420   |
| sample-11       |       | 2400 | 2430   |
| sample-12       |       | 3560 | 2350   |

| <b>fig. S4C</b> | Ipsi  | Contra |
|-----------------|-------|--------|
| sample-1        | 29000 | 6160   |
| sample-2        | 15600 | 3910   |

| <b>fig. S5A</b> | Ctrl | MR1 |
|-----------------|------|-----|
| sample-1        | 697  | 807 |
| sample-2        | 916  | 903 |

|          |      |     |
|----------|------|-----|
| sample-3 | 1220 | 423 |
| sample-4 | 4190 | 201 |
| sample-5 | 452  |     |
| sample-6 | 1410 |     |
| sample-7 | 4320 |     |

**fig. S5D**

|               | GL7+ CD38+ | GL7+ CD38lo | GL7- CD38+ |
|---------------|------------|-------------|------------|
| Ipsi_Ctrl-1   | 2.3        | 83          | 8.5        |
| Ipsi_Ctrl-2   | 3.1        | 89          | 3.1        |
| Ipsi_Ctrl-3   | 3.3        | 56          | 38         |
| Ipsi_Ctrl-4   | 6.3        | 82          | 7          |
| Ipsi_Ctrl-5   | 2.2        | 82          | 11         |
| Ipsi_Ctrl-6   | 6.1        | 90          | 3          |
| Ipsi_Ctrl-7   | 1.7        | 97          | 0.9        |
| Ipsi_MR1-1    | 1.6        | 79          | 13         |
| Ipsi_MR1-2    | 0.2        | 92          | 4          |
| Ipsi_MR1-3    | 3.4        | 50          | 38         |
| Ipsi_MR1-4    | 2.4        | 66          | 21         |
| Contra_Ctrl-1 | 0          | 0           | 100        |
| Contra_Ctrl-2 | 0          | 0           | 100        |
| Contra_Ctrl-3 | 5          | 0           | 90         |
| Contra_Ctrl-4 | 0          | 0           | 100        |

**fig. S7A**

|           | Ipsi | Contra |
|-----------|------|--------|
| sample-1  | 7.2  | 19     |
| sample-2  | 5.2  | 20     |
| sample-3  | 20.2 | 13     |
| sample-4  | 36.1 | 12     |
| sample-5  | 4    | 13     |
| sample-6  | 18   | 33     |
| sample-7  | 20   |        |
| sample-8  | 14   |        |
| sample-9  | 18   |        |
| sample-10 | 15   |        |

**fig. S7B**

|          | Ipsi | Contra |
|----------|------|--------|
| sample-1 | 17.3 | 9      |
| sample-2 | 43.9 | 17     |
| sample-3 | 20.7 | 30     |
| sample-4 | 25.1 | 17     |
| sample-5 | 31   | 13     |
